# Supplementary material for: Combined Transcriptome Analysis Reveals the Ovule Abortion Regulatory Mechanisms in the Female Sterile Line of Pinus tabuliformis Carr
Source: PubMed Central journal article supplement (PMC8003466; doi:10.3390/ijms22063138), 2021-03-19
Supplement: ijms-22-03138-s001.pdf [file ijms-22-03138-s001.pdf]

# Combined Transcriptome Analysis Reveals the Ovule Abortion Regulatory Mechanisms in the Female Sterile Line of *Pinus tabuliformis* Carr.

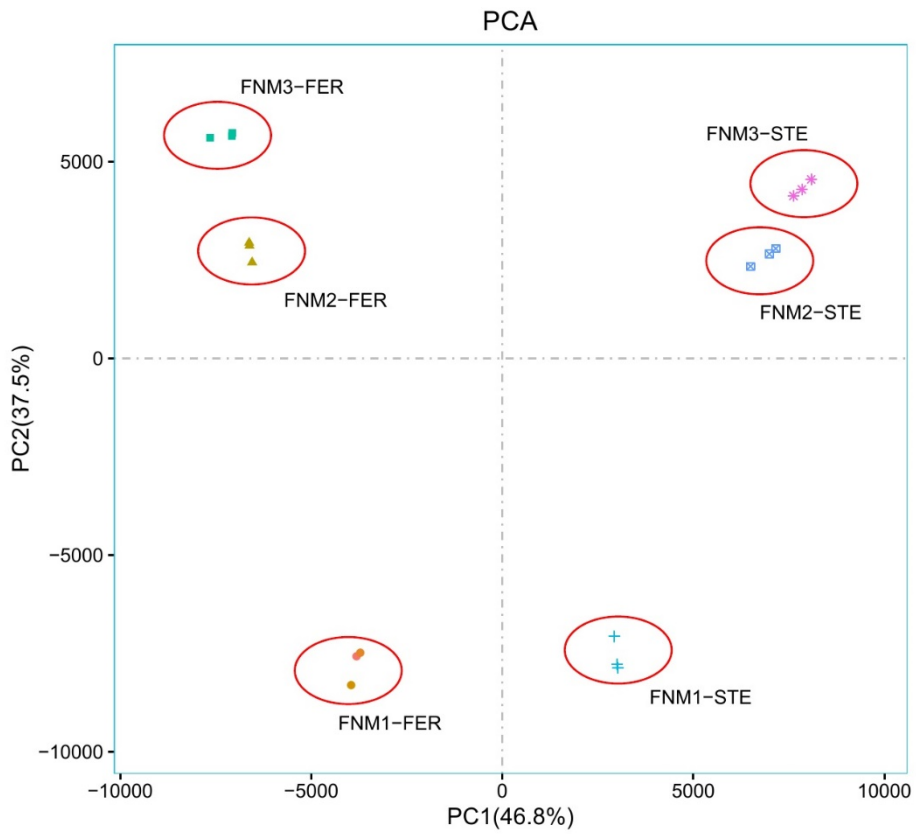

Figure S1. Principal component analysis of the RNA-Seq data.

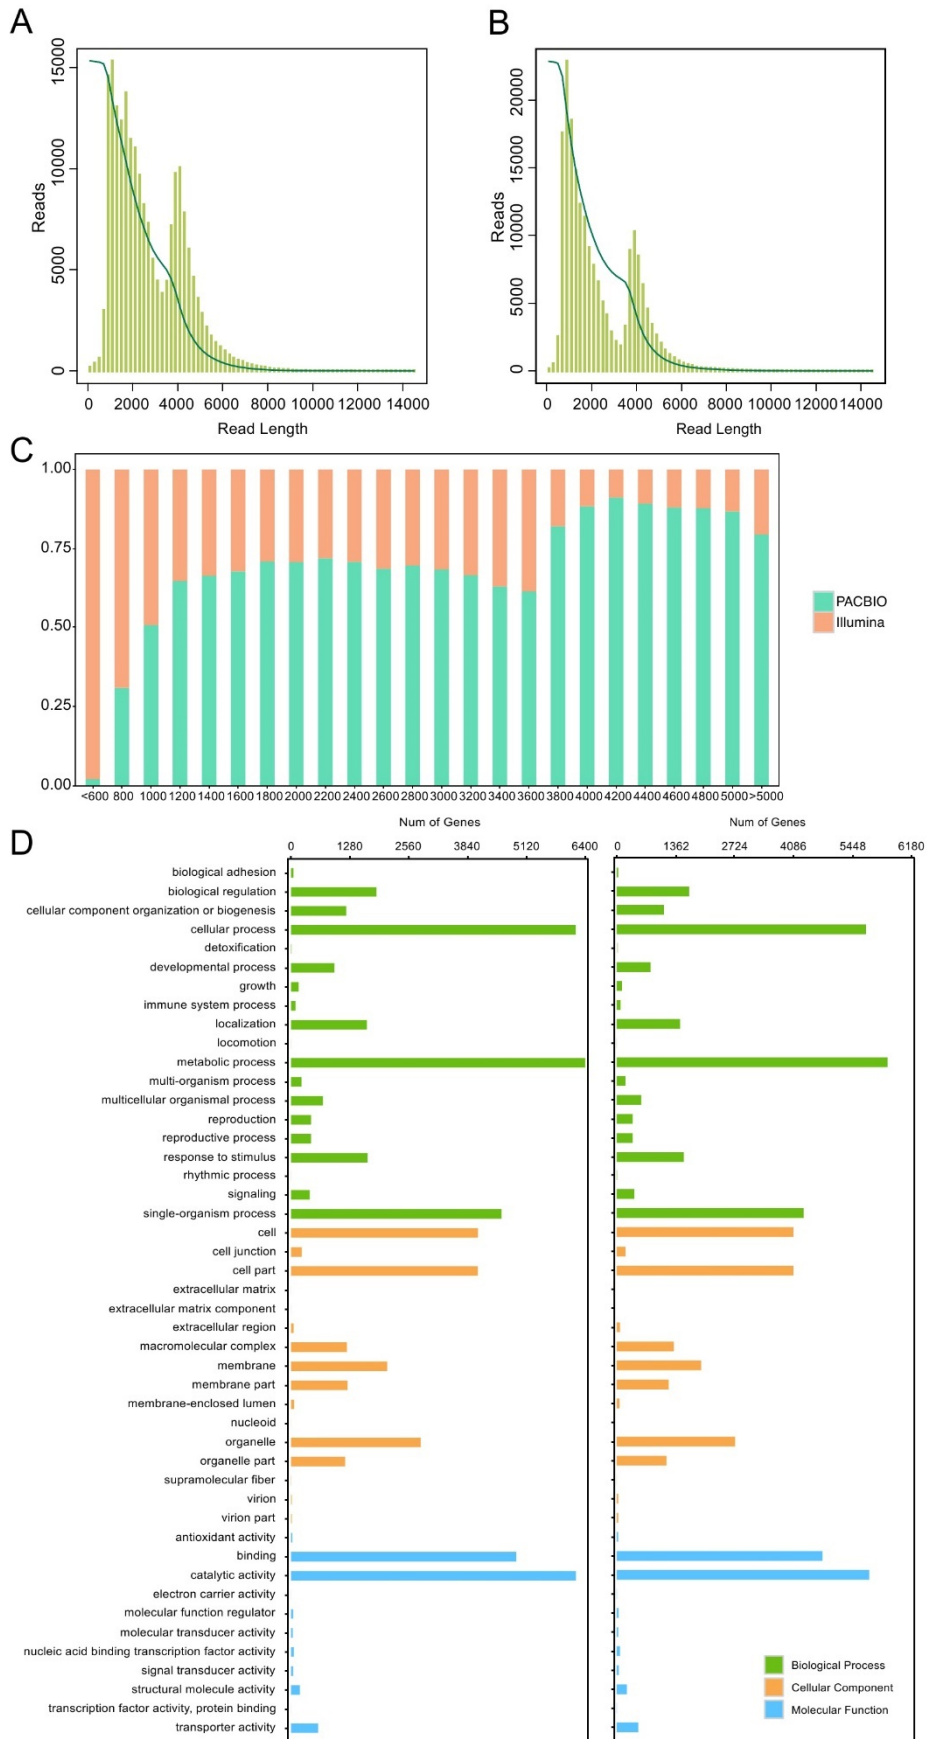

**Figure S2.** Length distribution of FLNC, FER (A), STE (B); comparison of transcript length distribution from different sequencing platforms (C); GO classification of full-length transcriptomes of FER and STE ovules in *P. tabuliformis* (D).

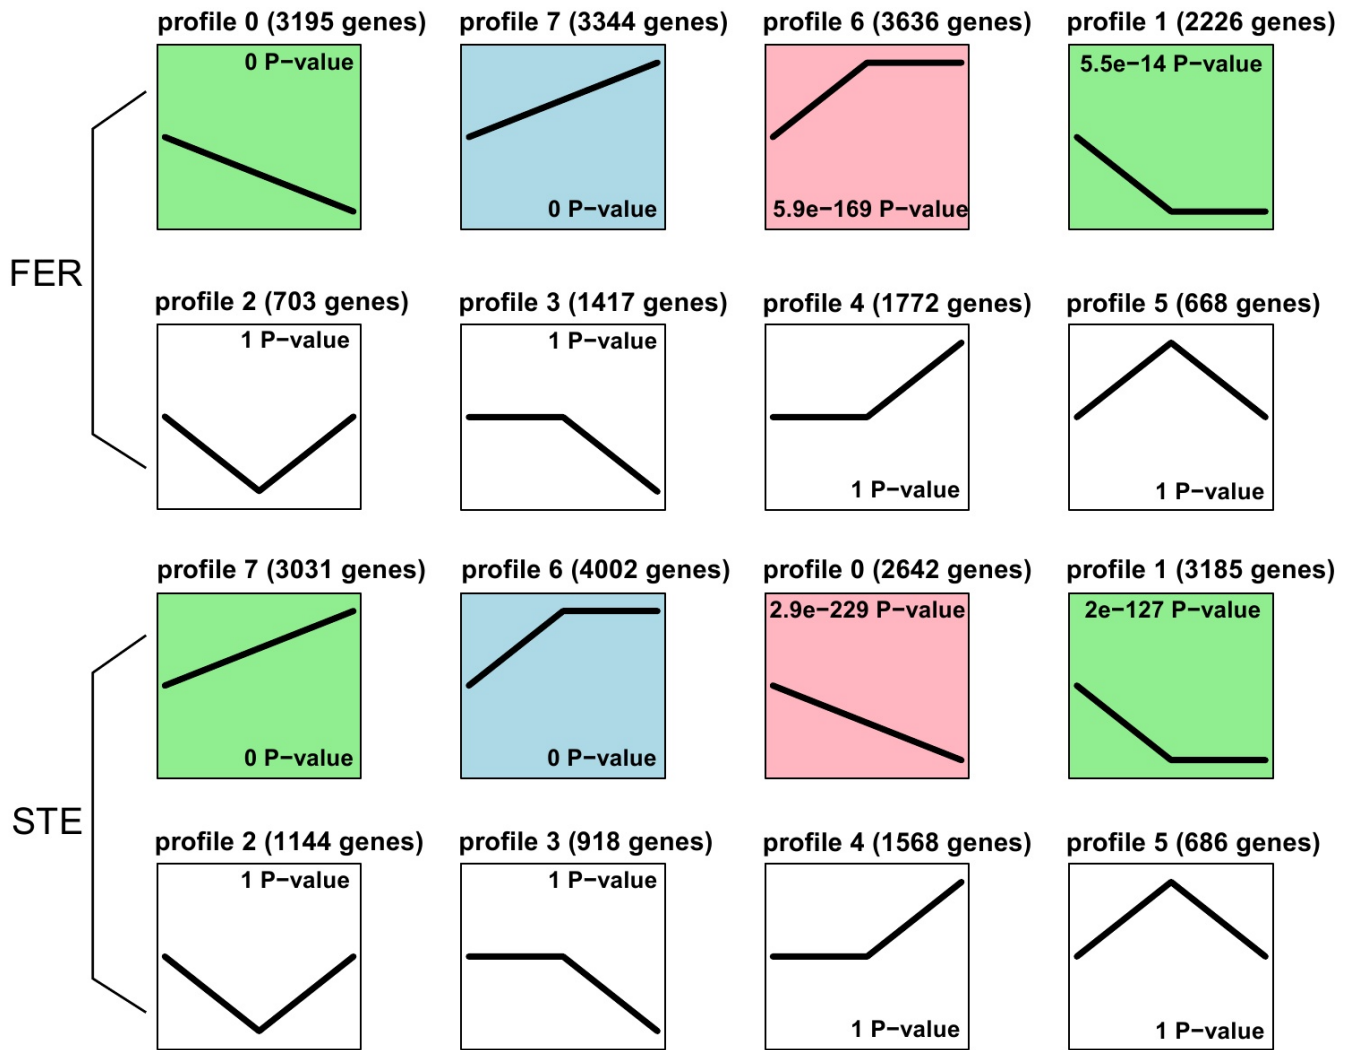

Figure S3. The expression patterns of DEGs analyzed by model profile.

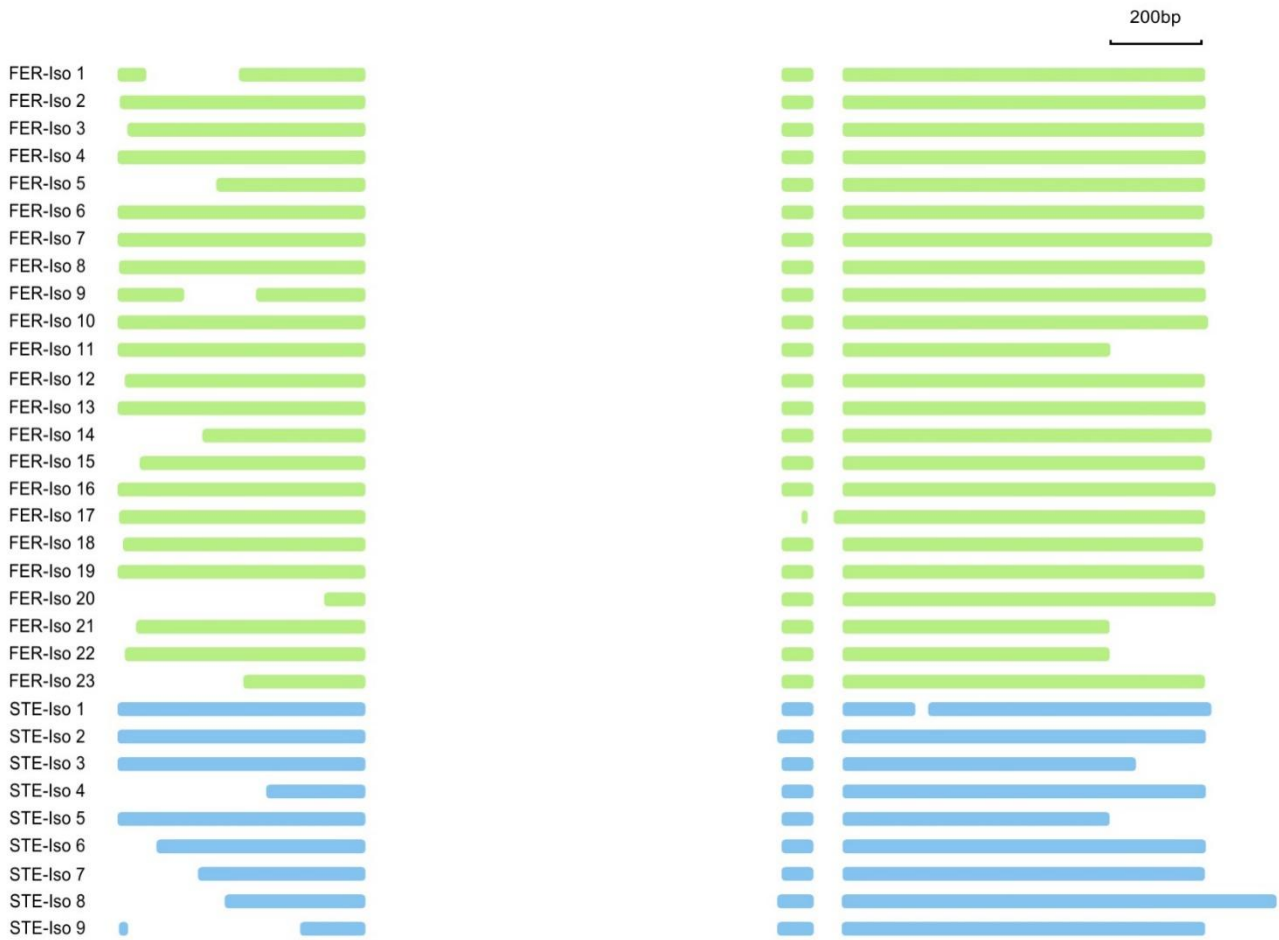

**Figure S4.** The model graph of *TUBA* generating different transcript isoforms of A3 splicing detected in FER and STE.

**Table S1.** Summary of SMRT sequencing.

| Sample | Total Number | Total Length (bp) | Maximum Length (bp) | Minimum Length (bp) | Average Length (bp) | N50 Length (bp) | GC Content |
|--------|--------------|-------------------|---------------------|---------------------|---------------------|-----------------|------------|
| FER    | 40828        | 112127427         | 9297                | 131                 | 2746.34             | 3621            | 41.59%     |
| STE    | 44195        | 98231600          | 10678               | 150                 | 2222.69             | 3322            | 41.40%     |

**Table S2.** KEGG pathway enrichment of DEGs of FER based on SMRT.

|    | Pathway                                      | All Genes With Pathway Annotation (10062) | Pathway ID |
|----|----------------------------------------------|-------------------------------------------|------------|
| 1  | Metabolic pathways                           | 3367 (33.46%)                             | ko01100    |
| 2  | Biosynthesis of secondary metabolites        | 1971 (19.59%)                             | ko01110    |
| 3  | Biosynthesis of antibiotics                  | 1118 (11.11%)                             | ko01130    |
| 4  | Microbial metabolism in diverse environments | 956 (9.5%)                                | ko01120    |
| 5  | RNA transport                                | 730 (7.26%)                               | ko03013    |
| 6  | Protein processing in endoplasmic reticulum  | 711 (7.07%)                               | ko04141    |
| 7  | Carbon metabolism                            | 695 (6.91%)                               | ko01200    |
| 8  | Spliceosome                                  | 692 (6.88%)                               | ko03040    |
| 9  | Biosynthesis of amino acids                  | 607 (6.03%)                               | ko01230    |
| 10 | Ribosome                                     | 528 (5.25%)                               | ko03010    |
| 11 | mRNA surveillance pathway                    | 465 (4.62%)                               | ko03015    |
| 12 | Endocytosis                                  | 447 (4.44%)                               | ko04144    |
| 13 | Plant hormone signal transduction            | 446 (4.43%)                               | ko04075    |

|    |                                             |             |         |
|----|---------------------------------------------|-------------|---------|
| 14 | Ubiquitin mediated proteolysis              | 438 (4.35%) | ko04120 |
| 15 | Glycolysis/Gluconeogenesis                  | 406 (4.03%) | ko00010 |
| 16 | RNA degradation                             | 368 (3.66%) | ko03018 |
| 17 | Starch and sucrose metabolism               | 360 (3.58%) | ko00500 |
| 18 | Purine metabolism                           | 357 (3.55%) | ko00230 |
| 19 | Ribosome biogenesis in eukaryotes           | 321 (3.19%) | ko03008 |
| 20 | Pyruvate metabolism                         | 292 (2.9%)  | ko00620 |
| 21 | Phagosome                                   | 274 (2.72%) | ko04145 |
| 22 | Plant-pathogen interaction                  | 250 (2.48%) | ko04626 |
| 23 | Pyrimidine metabolism                       | 249 (2.47%) | ko00240 |
| 24 | Amino sugar and nucleotide sugar metabolism | 248 (2.46%) | ko00520 |
| 25 | Oxidative phosphorylation                   | 243 (2.42%) | ko00190 |
| 26 | Cysteine and methionine metabolism          | 232 (2.31%) | ko00270 |
| 27 | Fatty acid metabolism                       | 230 (2.29%) | ko01212 |
| 28 | Proteasome                                  | 215 (2.14%) | ko03050 |
| 29 | Carbon fixation in photosynthetic organisms | 200 (1.99%) | ko00710 |
| 30 | Fatty acid degradation                      | 195 (1.94%) | ko00071 |
| 31 | Peroxisome                                  | 194 (1.93%) | ko04146 |
| 32 | Citrate cycle (TCA cycle)                   | 187 (1.86%) | ko00020 |
| 33 | Aminoacyl-tRNA biosynthesis                 | 183 (1.82%) | ko00970 |
| 34 | Glyoxylate and dicarboxylate metabolism     | 173 (1.72%) | ko00630 |
| 35 | Phenylpropanoid biosynthesis                | 166 (1.65%) | ko00940 |
| 36 | Galactose metabolism                        | 164 (1.63%) | ko00052 |
| 37 | Glutathione metabolism                      | 162 (1.61%) | ko00480 |
| 38 | Glycine, serine and threonine metabolism    | 161 (1.6%)  | ko00260 |
| 39 | Glycerophospholipid metabolism              | 160 (1.59%) | ko00564 |
| 40 | Nucleotide excision repair                  | 157 (1.56%) | ko03420 |
| 41 | DNA replication                             | 148 (1.47%) | ko03030 |
| 42 | Fatty acid biosynthesis                     | 139 (1.38%) | ko00061 |
| 43 | 2-Oxocarboxylic acid metabolism             | 138 (1.37%) | ko01210 |
| 44 | alpha-Linolenic acid metabolism             | 135 (1.34%) | ko00592 |
| 45 | Alanine, aspartate and glutamate metabolism | 132 (1.31%) | ko00250 |
| 46 | Arginine and proline metabolism             | 132 (1.31%) | ko00330 |
| 47 | Fructose and mannose metabolism             | 131 (1.3%)  | ko00051 |
| 48 | Tyrosine metabolism                         | 127 (1.26%) | ko00350 |
| 49 | Inositol phosphate metabolism               | 119 (1.18%) | ko00562 |
| 50 | Circadian rhythm - plant                    | 119 (1.18%) | ko04712 |
| 51 | beta-Alanine metabolism                     | 116 (1.15%) | ko00410 |
| 52 | Pentose phosphate pathway                   | 113 (1.12%) | ko00030 |
| 53 | ABC transporters                            | 112 (1.11%) | ko02010 |
| 54 | Ascorbate and aldarate metabolism           | 110 (1.09%) | ko00053 |
| 55 | RNA polymerase                              | 110 (1.09%) | ko03020 |
| 56 | Phosphatidylinositol signaling system       | 110 (1.09%) | ko04070 |
| 57 | Pentose and glucuronate interconversions    | 109 (1.08%) | ko00040 |
| 58 | Lysine degradation                          | 106 (1.05%) | ko00310 |
| 59 | Mismatch repair                             | 104 (1.03%) | ko03430 |
| 60 | Valine, leucine and isoleucine degradation  | 101 (1%)    | ko00280 |
| 61 | Propanoate metabolism                       | 99 (0.98%)  | ko00640 |
| 62 | Phenylalanine metabolism                    | 98 (0.97%)  | ko00360 |
| 63 | Protein export                              | 95 (0.94%)  | ko03060 |
| 64 | Terpenoid backbone biosynthesis             | 94 (0.93%)  | ko00900 |
| 65 | Flavonoid biosynthesis                      | 93 (0.92%)  | ko00941 |

|     |                                                        |            |         |
|-----|--------------------------------------------------------|------------|---------|
| 66  | Glycerolipid metabolism                                | 90 (0.89%) | ko00561 |
| 67  | Basal transcription factors                            | 88 (0.87%) | ko03022 |
| 68  | Regulation of autophagy                                | 83 (0.82%) | ko04140 |
| 69  | Phenylalanine, tyrosine and tryptophan biosynthesis    | 80 (0.8%)  | ko00400 |
| 70  | Tryptophan metabolism                                  | 77 (0.77%) | ko00380 |
| 71  | Homologous recombination                               | 74 (0.74%) | ko03440 |
| 72  | Biosynthesis of unsaturated fatty acids                | 73 (0.73%) | ko01040 |
| 73  | Cyanoamino acid metabolism                             | 71 (0.71%) | ko00460 |
| 74  | N-Glycan biosynthesis                                  | 71 (0.71%) | ko00510 |
| 75  | Sphingolipid metabolism                                | 69 (0.69%) | ko00600 |
| 76  | Pantothenate and CoA biosynthesis                      | 68 (0.68%) | ko00770 |
| 77  | Base excision repair                                   | 68 (0.68%) | ko03410 |
| 78  | Butanoate metabolism                                   | 62 (0.62%) | ko00650 |
| 79  | Porphyrin and chlorophyll metabolism                   | 61 (0.61%) | ko00860 |
| 80  | Arginine biosynthesis                                  | 60 (0.6%)  | ko00220 |
| 81  | Histidine metabolism                                   | 60 (0.6%)  | ko00340 |
| 82  | Ether lipid metabolism                                 | 60 (0.6%)  | ko00565 |
| 83  | Tropane, piperidine and pyridine alkaloid biosynthesis | 57 (0.57%) | ko00960 |
| 84  | Selenocompound metabolism                              | 54 (0.54%) | ko00450 |
| 85  | One carbon pool by folate                              | 51 (0.51%) | ko00670 |
| 86  | Isoquinoline alkaloid biosynthesis                     | 49 (0.49%) | ko00950 |
| 87  | Steroid biosynthesis                                   | 47 (0.47%) | ko00100 |
| 88  | SNARE interactions in vesicular transport              | 47 (0.47%) | ko04130 |
| 89  | Valine, leucine and isoleucine biosynthesis            | 46 (0.46%) | ko00290 |
| 90  | Nitrogen metabolism                                    | 45 (0.45%) | ko00910 |
| 91  | Photosynthesis                                         | 38 (0.38%) | ko00195 |
| 92  | Ubiquinone and other terpenoid-quinone biosynthesis    | 37 (0.37%) | ko00130 |
| 93  | Stilbenoid, diarylheptanoid and gingerol biosynthesis  | 37 (0.37%) | ko00945 |
| 94  | Fatty acid elongation                                  | 36 (0.36%) | ko00062 |
| 95  | Sulfur metabolism                                      | 34 (0.34%) | ko00920 |
| 96  | Taurine and hypotaurine metabolism                     | 33 (0.33%) | ko00430 |
| 97  | Other glycan degradation                               | 30 (0.3%)  | ko00511 |
| 98  | Lysine biosynthesis                                    | 28 (0.28%) | ko00300 |
| 99  | Nicotinate and nicotinamide metabolism                 | 28 (0.28%) | ko00760 |
| 100 | Synthesis and degradation of ketone bodies             | 26 (0.26%) | ko00072 |
| 101 | Other types of O-glycan biosynthesis                   | 26 (0.26%) | ko00514 |
| 102 | Cutin, suberine and wax biosynthesis                   | 24 (0.24%) | ko00073 |
| 103 | Biotin metabolism                                      | 24 (0.24%) | ko00780 |
| 104 | Linoleic acid metabolism                               | 23 (0.23%) | ko00591 |
| 105 | Vitamin B6 metabolism                                  | 23 (0.23%) | ko00750 |
| 106 | Flavone and flavonol biosynthesis                      | 23 (0.23%) | ko00944 |
| 107 | Monobactam biosynthesis                                | 22 (0.22%) | ko00261 |
| 108 | Folate biosynthesis                                    | 22 (0.22%) | ko00790 |
| 109 | Limonene and pinene degradation                        | 22 (0.22%) | ko00903 |
| 110 | Arachidonic acid metabolism                            | 20 (0.2%)  | ko00590 |
| 111 | Thiamine metabolism                                    | 19 (0.19%) | ko00730 |
| 112 | Non-homologous end-joining                             | 19 (0.19%) | ko03450 |
| 113 | C5-Branched dibasic acid metabolism                    | 18 (0.18%) | ko00660 |
| 114 | Glycosylphosphatidylinositol(GPI)-anchor biosynthesis  | 16 (0.16%) | ko00563 |
| 115 | Sulfur relay system                                    | 15 (0.15%) | ko04122 |
| 116 | Glycosphingolipid biosynthesis – globo series          | 14 (0.14%) | ko00603 |

|     |                                                 |            |         |
|-----|-------------------------------------------------|------------|---------|
| 117 | Degradation of aromatic compounds               | 14 (0.14%) | ko01220 |
| 118 | Glycosaminoglycan degradation                   | 12 (0.12%) | ko00531 |
| 119 | Carotenoid biosynthesis                         | 11 (0.11%) | ko00906 |
| 120 | Photosynthesis - antenna proteins               | 8 (0.08%)  | ko00196 |
| 121 | Brassinosteroid biosynthesis                    | 7 (0.07%)  | ko00905 |
| 122 | Lipoic acid metabolism                          | 6 (0.06%)  | ko00785 |
| 123 | Zeatin biosynthesis                             | 6 (0.06%)  | ko00908 |
| 124 | Glycosphingolipid biosynthesis – ganglio series | 5 (0.05%)  | ko00604 |
| 125 | Sesquiterpenoid and triterpenoid biosynthesis   | 5 (0.05%)  | ko00909 |
| 126 | Caffeine metabolism                             | 4 (0.04%)  | ko00232 |
| 127 | Diterpenoid biosynthesis                        | 4 (0.04%)  | ko00904 |
| 128 | Riboflavin metabolism                           | 2 (0.02%)  | ko00740 |
| 129 | Anthocyanin biosynthesis                        | 1 (0.01%)  | ko00942 |

**Table S3.** KEGG pathway enrichment of DEGs of STE based on SMRT.

|    | Pathway                                      | All Genes With Pathway Annotation (11185) | Pathway ID |
|----|----------------------------------------------|-------------------------------------------|------------|
| 1  | Metabolic pathways                           | 4116 (36.8%)                              | ko01100    |
| 2  | Biosynthesis of secondary metabolites        | 2499 (22.34%)                             | ko01110    |
| 3  | Biosynthesis of antibiotics                  | 1379 (12.33%)                             | ko01130    |
| 4  | Microbial metabolism in diverse environments | 1173 (10.49%)                             | ko01120    |
| 5  | Ribosome                                     | 925 (8.27%)                               | ko03010    |
| 6  | Carbon metabolism                            | 866 (7.74%)                               | ko01200    |
| 7  | Biosynthesis of amino acids                  | 772 (6.9%)                                | ko01230    |
| 8  | Spliceosome                                  | 736 (6.58%)                               | ko03040    |
| 9  | Protein processing in endoplasmic reticulum  | 725 (6.48%)                               | ko04141    |
| 10 | RNA transport                                | 695 (6.21%)                               | ko03013    |
| 11 | Glycolysis/Gluconeogenesis                   | 558 (4.99%)                               | ko00010    |
| 12 | Endocytosis                                  | 472 (4.22%)                               | ko04144    |
| 13 | Ubiquitin mediated proteolysis               | 454 (4.06%)                               | ko04120    |
| 14 | Plant hormone signal transduction            | 424 (3.79%)                               | ko04075    |
| 15 | mRNA surveillance pathway                    | 400 (3.58%)                               | ko03015    |
| 16 | Starch and sucrose metabolism                | 384 (3.43%)                               | ko00500    |
| 17 | RNA degradation                              | 368 (3.29%)                               | ko03018    |
| 18 | Purine metabolism                            | 355 (3.17%)                               | ko00230    |
| 19 | Ribosome biogenesis in eukaryotes            | 347 (3.1%)                                | ko03008    |
| 20 | Cysteine and methionine metabolism           | 323 (2.89%)                               | ko00270    |
| 21 | Pyruvate metabolism                          | 310 (2.77%)                               | ko00620    |
| 22 | Oxidative phosphorylation                    | 301 (2.69%)                               | ko00190    |
| 23 | Proteasome                                   | 269 (2.41%)                               | ko03050    |
| 24 | Plant-pathogen interaction                   | 264 (2.36%)                               | ko04626    |
| 25 | Carbon fixation in photosynthetic organisms  | 260 (2.32%)                               | ko00710    |
| 26 | Pyrimidine metabolism                        | 253 (2.26%)                               | ko00240    |
| 27 | Phenylpropanoid biosynthesis                 | 246 (2.2%)                                | ko00940    |
| 28 | Phagosome                                    | 244 (2.18%)                               | ko04145    |
| 29 | Fatty acid metabolism                        | 241 (2.15%)                               | ko01212    |
| 30 | Citrate cycle (TCA cycle)                    | 238 (2.13%)                               | ko00020    |
| 31 | Amino sugar and nucleotide sugar metabolism  | 232 (2.07%)                               | ko00520    |
| 32 | Fatty acid degradation                       | 222 (1.98%)                               | ko00071    |
| 33 | Peroxisome                                   | 218 (1.95%)                               | ko04146    |

|    |                                                        |             |         |
|----|--------------------------------------------------------|-------------|---------|
| 34 | Glycerophospholipid metabolism                         | 202 (1.81%) | ko00564 |
| 35 | Glyoxylate and dicarboxylate metabolism                | 202 (1.81%) | ko00630 |
| 36 | Glycine, serine and threonine metabolism               | 194 (1.73%) | ko00260 |
| 37 | Tyrosine metabolism                                    | 187 (1.67%) | ko00350 |
| 38 | Glutathione metabolism                                 | 182 (1.63%) | ko00480 |
| 39 | 2-Oxocarboxylic acid metabolism                        | 178 (1.59%) | ko01210 |
| 40 | Galactose metabolism                                   | 175 (1.56%) | ko00052 |
| 41 | alpha-Linolenic acid metabolism                        | 167 (1.49%) | ko00592 |
| 42 | Alanine, aspartate and glutamate metabolism            | 166 (1.48%) | ko00250 |
| 43 | Aminoacyl-tRNA biosynthesis                            | 162 (1.45%) | ko00970 |
| 44 | Fructose and mannose metabolism                        | 161 (1.44%) | ko00051 |
| 45 | Flavonoid biosynthesis                                 | 147 (1.31%) | ko00941 |
| 46 | Arginine and proline metabolism                        | 143 (1.28%) | ko00330 |
| 47 | Fatty acid biosynthesis                                | 141 (1.26%) | ko00061 |
| 48 | beta-Alanine metabolism                                | 141 (1.26%) | ko00410 |
| 49 | Nucleotide excision repair                             | 139 (1.24%) | ko03420 |
| 50 | Circadian rhythm - plant                               | 134 (1.2%)  | ko04712 |
| 51 | Pentose phosphate pathway                              | 132 (1.18%) | ko00030 |
| 52 | Phenylalanine metabolism                               | 130 (1.16%) | ko00360 |
| 53 | Ascorbate and aldarate metabolism                      | 129 (1.15%) | ko00053 |
| 54 | Inositol phosphate metabolism                          | 121 (1.08%) | ko00562 |
| 55 | Valine, leucine and isoleucine degradation             | 120 (1.07%) | ko00280 |
| 56 | Glycerolipid metabolism                                | 119 (1.06%) | ko00561 |
| 57 | Terpenoid backbone biosynthesis                        | 118 (1.05%) | ko00900 |
| 58 | DNA replication                                        | 118 (1.05%) | ko03030 |
| 59 | Phosphatidylinositol signaling system                  | 116 (1.04%) | ko04070 |
| 60 | RNA polymerase                                         | 115 (1.03%) | ko03020 |
| 61 | Phenylalanine, tyrosine and tryptophan biosynthesis    | 112 (1%)    | ko00400 |
| 62 | Protein export                                         | 109 (0.97%) | ko03060 |
| 63 | Pentose and glucuronate interconversions               | 107 (0.96%) | ko00040 |
| 64 | Biosynthesis of unsaturated fatty acids                | 104 (0.93%) | ko01040 |
| 65 | Mismatch repair                                        | 101 (0.9%)  | ko03430 |
| 66 | Lysine degradation                                     | 100 (0.89%) | ko00310 |
| 67 | N-Glycan biosynthesis                                  | 96 (0.86%)  | ko00510 |
| 68 | Propanoate metabolism                                  | 95 (0.85%)  | ko00640 |
| 69 | Arginine biosynthesis                                  | 85 (0.76%)  | ko00220 |
| 70 | Pantothenate and CoA biosynthesis                      | 82 (0.73%)  | ko00770 |
| 71 | ABC transporters                                       | 80 (0.72%)  | ko02010 |
| 72 | Regulation of autophagy                                | 79 (0.71%)  | ko04140 |
| 73 | Butanoate metabolism                                   | 78 (0.7%)   | ko00650 |
| 74 | Tryptophan metabolism                                  | 76 (0.68%)  | ko00380 |
| 75 | Cyanoamino acid metabolism                             | 76 (0.68%)  | ko00460 |
| 76 | Tropane, piperidine and pyridine alkaloid biosynthesis | 75 (0.67%)  | ko00960 |
| 77 | Valine, leucine and isoleucine biosynthesis            | 71 (0.63%)  | ko00290 |
| 78 | Selenocompound metabolism                              | 70 (0.63%)  | ko00450 |
| 79 | Ether lipid metabolism                                 | 70 (0.63%)  | ko00565 |
| 80 | Basal transcription factors                            | 70 (0.63%)  | ko03022 |
| 81 | Porphyrin and chlorophyll metabolism                   | 67 (0.6%)   | ko00860 |
| 82 | Homologous recombination                               | 67 (0.6%)   | ko03440 |
| 83 | Sphingolipid metabolism                                | 66 (0.59%)  | ko00600 |
| 84 | Base excision repair                                   | 64 (0.57%)  | ko03410 |
| 85 | Isoquinoline alkaloid biosynthesis                     | 62 (0.55%)  | ko00950 |



|     |                                                       |            |         |
|-----|-------------------------------------------------------|------------|---------|
| 86  | Photosynthesis                                        | 56 (0.5%)  | ko00195 |
| 87  | Histidine metabolism                                  | 55 (0.49%) | ko00340 |
| 88  | Sulfur metabolism                                     | 55 (0.49%) | ko00920 |
| 89  | Nitrogen metabolism                                   | 54 (0.48%) | ko00910 |
| 90  | Biotin metabolism                                     | 52 (0.46%) | ko00780 |
| 91  | SNARE interactions in vesicular transport             | 51 (0.46%) | ko04130 |
| 92  | Steroid biosynthesis                                  | 49 (0.44%) | ko00100 |
| 93  | Stilbenoid, diarylheptanoid and gingerol biosynthesis | 46 (0.41%) | ko00945 |
| 94  | One carbon pool by folate                             | 44 (0.39%) | ko00670 |
| 95  | Ubiquinone and other terpenoid-quinone biosynthesis   | 43 (0.38%) | ko00130 |
| 96  | Taurine and hypotaurine metabolism                    | 37 (0.33%) | ko00430 |
| 97  | Degradation of aromatic compounds                     | 37 (0.33%) | ko01220 |
| 98  | Arachidonic acid metabolism                           | 35 (0.31%) | ko00590 |
| 99  | Nicotinate and nicotinamide metabolism                | 33 (0.3%)  | ko00760 |
| 100 | Linoleic acid metabolism                              | 31 (0.28%) | ko00591 |
| 101 | Lysine biosynthesis                                   | 30 (0.27%) | ko00300 |
| 102 | Fatty acid elongation                                 | 28 (0.25%) | ko00062 |
| 103 | Monobactam biosynthesis                               | 28 (0.25%) | ko00261 |
| 104 | Thiamine metabolism                                   | 28 (0.25%) | ko00730 |
| 105 | Other types of O-glycan biosynthesis                  | 27 (0.24%) | ko00514 |
| 106 | Limonene and pinene degradation                       | 27 (0.24%) | ko00903 |
| 107 | Other glycan degradation                              | 25 (0.22%) | ko00511 |
| 108 | Synthesis and degradation of ketone bodies            | 24 (0.21%) | ko00072 |
| 109 | C5-Branched dibasic acid metabolism                   | 23 (0.21%) | ko00660 |
| 110 | Vitamin B6 metabolism                                 | 23 (0.21%) | ko00750 |
| 111 | Cutin, suberine and wax biosynthesis                  | 21 (0.19%) | ko00073 |
| 112 | Glycosylphosphatidylinositol(GPI)-anchor biosynthesis | 20 (0.18%) | ko00563 |
| 113 | Folate biosynthesis                                   | 20 (0.18%) | ko00790 |
| 114 | Carotenoid biosynthesis                               | 20 (0.18%) | ko00906 |
| 115 | Flavone and flavonol biosynthesis                     | 17 (0.15%) | ko00944 |
| 116 | Non-homologous end-joining                            | 16 (0.14%) | ko03450 |
| 117 | Sulfur relay system                                   | 16 (0.14%) | ko04122 |
| 118 | Glycosaminoglycan degradation                         | 15 (0.13%) | ko00531 |
| 119 | Brassinosteroid biosynthesis                          | 15 (0.13%) | ko00905 |
| 120 | Zeatin biosynthesis                                   | 15 (0.13%) | ko00908 |
| 121 | Sesquiterpenoid and triterpenoid biosynthesis         | 15 (0.13%) | ko00909 |
| 122 | Glycosphingolipid biosynthesis - globo series         | 14 (0.13%) | ko00603 |
| 123 | Photosynthesis - antenna proteins                     | 13 (0.12%) | ko00196 |
| 124 | Diterpenoid biosynthesis                              | 12 (0.11%) | ko00904 |
| 125 | Caffeine metabolism                                   | 7 (0.06%)  | ko00232 |
| 126 | Riboflavin metabolism                                 | 4 (0.04%)  | ko00740 |
| 127 | Lipoic acid metabolism                                | 3 (0.03%)  | ko00785 |
| 128 | Glycosphingolipid biosynthesis - ganglio series       | 2 (0.02%)  | ko00604 |
| 129 | Monoterpenoid biosynthesis                            | 1 (0.01%)  | ko00902 |

**Table S4.** KEGG pathway enrichment of DEGs of upregulated in FER also downregulated in STE.

|    | Pathway                                      | DEGs Genes with Pathway Annotation (4) | All genes With Pathway Annotation (20069) | Pvalue  | Qvalue  | Pathway ID |
|----|----------------------------------------------|----------------------------------------|-------------------------------------------|---------|---------|------------|
| 1  | Pentose phosphate pathway                    | 1 (25%)                                | 226 (1.13%)                               | 0.04429 | 0.22261 | ko00030    |
| 2  | Fructose and mannose metabolism              | 1 (25%)                                | 272 (1.36%)                               | 0.05313 | 0.22261 | ko00051    |
| 3  | Galactose metabolism                         | 1 (25%)                                | 317 (1.58%)                               | 0.06171 | 0.22261 | ko00052    |
| 4  | Aminoacyl-tRNA biosynthesis                  | 1 (25%)                                | 327 (1.63%)                               | 0.0636  | 0.22261 | ko00970    |
| 5  | Phagosome                                    | 1 (25%)                                | 475 (2.37%)                               | 0.09137 | 0.25584 | ko04145    |
| 6  | RNA degradation                              | 1 (25%)                                | 699 (3.48%)                               | 0.13222 | 0.30851 | ko03018    |
| 7  | Glycolysis/Gluconeogenesis                   | 1 (25%)                                | 902 (4.49%)                               | 0.16803 | 0.33606 | ko00010    |
| 8  | Biosynthesis of amino acids                  | 1 (25%)                                | 1287 (6.41%)                              | 0.23289 | 0.36196 | ko01230    |
| 9  | Ribosome                                     | 1 (25%)                                | 1359 (6.77%)                              | 0.24459 | 0.36196 | ko03010    |
| 10 | Carbon metabolism                            | 1 (25%)                                | 1446 (7.21%)                              | 0.25854 | 0.36196 | ko01200    |
| 11 | Microbial metabolism in diverse environments | 1 (25%)                                | 1991 (9.92%)                              | 0.34161 | 0.43477 | ko01120    |
| 12 | Biosynthesis of antibiotics                  | 1 (25%)                                | 2319 (11.56%)                             | 0.38811 | 0.4528  | ko01130    |
| 13 | Biosynthesis of secondary metabolites        | 1 (25%)                                | 4201 (20.93%)                             | 0.6092  | 0.65607 | ko01110    |
| 14 | Metabolic pathways                           | 1 (25%)                                | 7058 (35.17%)                             | 0.82337 | 0.82337 | ko01100    |

**Table S5.** KEGG pathway enrichment of DEGs of upregulated in STE also downregulated in FER.

|    | Pathway                                             | DEGs Genes With Pathway Annotation (25) | All Genes With Pathway Annotation (20069) | Pvalue  | Qvalue  | Pathway ID |
|----|-----------------------------------------------------|-----------------------------------------|-------------------------------------------|---------|---------|------------|
| 1  | Phenylpropanoid biosynthesis                        | 7 (28%)                                 | 395 (1.97%)                               | 0       | 9E-06   | ko00940    |
| 2  | Metabolic pathways                                  | 19 (76%)                                | 7058 (35.17%)                             | 3.7E-05 | 0.00044 | ko01100    |
| 3  | Starch and sucrose metabolism                       | 6 (24%)                                 | 703 (3.5%)                                | 0.00018 | 0.00145 | ko00500    |
| 4  | Biosynthesis of secondary metabolites               | 12 (48%)                                | 4201 (20.93%)                             | 0.00231 | 0.01387 | ko01110    |
| 5  | Phenylalanine, tyrosine and tryptophan biosynthesis | 2 (8%)                                  | 182 (0.91%)                               | 0.0214  | 0.10272 | ko00400    |
| 6  | Taurine and hypotaurine metabolism                  | 1 (4%)                                  | 68 (0.34%)                                | 0.0814  | 0.32559 | ko00430    |
| 7  | Amino sugar and nucleotide sugar metabolism         | 2 (8%)                                  | 454 (2.26%)                               | 0.10897 | 0.33576 | ko00520    |
| 8  | Nitrogen metabolism                                 | 1 (4%)                                  | 95 (0.47%)                                | 0.11192 | 0.33576 | ko00910    |
| 9  | Butanoate metabolism                                | 1 (4%)                                  | 134 (0.67%)                               | 0.1543  | 0.41145 | ko00650    |
| 10 | Phosphatidylinositol signaling system               | 1 (4%)                                  | 219 (1.09%)                               | 0.24003 | 0.51106 | ko04070    |
| 11 | Inositol phosphate metabolism                       | 1 (4%)                                  | 230 (1.15%)                               | 0.25049 | 0.51106 | ko00562    |
| 12 | beta-Alanine metabolism                             | 1 (4%)                                  | 245 (1.22%)                               | 0.26454 | 0.51106 | ko00410    |
| 13 | Endocytosis                                         | 2 (8%)                                  | 855 (4.26%)                               | 0.28864 | 0.51106 | ko04144    |
| 14 | Alanine, aspartate and glutamate metabolism         | 1 (4%)                                  | 282 (1.41%)                               | 0.29812 | 0.51106 | ko00250    |
| 15 | Citrate cycle (TCA cycle)                           | 1 (4%)                                  | 389 (1.94%)                               | 0.38715 | 0.61944 | ko00020    |
| 16 | Oxidative phosphorylation                           | 1 (4%)                                  | 503 (2.51%)                               | 0.47004 | 0.68141 | ko00190    |
| 17 | Biosynthesis of amino acids                         | 2 (8%)                                  | 1287 (6.41%)                              | 0.48267 | 0.68141 | ko01230    |
| 18 | Spliceosome                                         | 2 (8%)                                  | 1367 (6.81%)                              | 0.51547 | 0.68729 | ko03040    |
| 19 | Biosynthesis of antibiotics                         | 3 (12%)                                 | 2319 (11.56%)                             | 0.56427 | 0.71276 | ko01130    |
| 20 | Plant hormone signal transduction                   | 1 (4%)                                  | 800 (3.99%)                               | 0.63854 | 0.74087 | ko04075    |
| 21 | mRNA surveillance pathway                           | 1 (4%)                                  | 821 (4.09%)                               | 0.64826 | 0.74087 | ko03015    |
| 22 | Microbial metabolism in diverse environments        | 2 (8%)                                  | 1991 (9.92%)                              | 0.72474 | 0.79063 | ko01120    |
| 23 | Protein processing in endoplasmic reticulum         | 1 (4%)                                  | 1338 (6.67%)                              | 0.822   | 0.82366 | ko04141    |
| 24 | RNA transport                                       | 1 (4%)                                  | 1345 (6.7%)                               | 0.82366 | 0.82366 | ko03013    |

**Table S6.** Genes list with obvious different expression levels in FER and STE.

| Symbol | FER-FNM1-1_rpkm | FER-FNM1-2_rpkm | FER-FNM1-3_rpkm | FER-FNM2-1_rpkm | FER-FNM2-2_rpkm | FER-FNM2-3_rpkm | FER-FNM3-1_rpkm | FER-FNM3-2_rpkm | FER-FNM3-3_rpkm | STE-FNM1-1_rpkm | STE-FNM1-2_rpkm | STE-FNM1-3_rpkm | STE-FNM2-1_rpkm | STE-FNM2-2_rpkm | STE-FNM2-3_rpkm | STE-FNM3-1_rpkm | STE-FNM3-2_rpkm | STE-FNM3-3_rpkm |
|--------|-----------------|-----------------|-----------------|-----------------|-----------------|-----------------|-----------------|-----------------|-----------------|-----------------|-----------------|-----------------|-----------------|-----------------|-----------------|-----------------|-----------------|-----------------|
| PFK2   | 40.45           | 30.98           | 35.29           | 92.41           | 70.87           | 110.28          | 140.7           | 210.05          | 115.75          | 150.57          | 12.77           | 14.1            | 3.14            | 3.73            | 5.97            | 6.16            | 7.98            | 7.49            |
| SUS2   | 17.06           | 27.19           | 16.43           | 16.81           | 11.24           | 10.36           | 9.06            | 8.51            | 5.25            | 2.31            | 2.35            | 2.2             | 8.99            | 10.94           | 12.89           | 5.17            | 8.86            | 6.81            |
| SUS    | 54.85           | 90.14           | 51.07           | 48.92           | 39.44           | 34.02           | 21.84           | 31.52           | 19.89           | 7.01            | 6.12            | 9.37            | 44.54           | 45.2            | 48.23           | 21.57           | 32.06           | 21.4            |
| SUS    | 26.89           | 37.46           | 24.23           | 16.04           | 16.19           | 17.11           | 9.43            | 14.69           | 9.15            | 2.95            | 3.54            | 3.57            | 17.59           | 22.24           | 19.69           | 8.99            | 9.59            | 8.52            |
| SUS    | 48.91           | 85.19           | 49.06           | 37.55           | 33.83           | 29.91           | 18.65           | 27.4            | 17.43           | 8.27            | 7.22            | 9.95            | 42.38           | 43.09           | 45.94           | 13.61           | 29.06           | 18.75           |
| AGPL1  | 71.98           | 50.77           | 47              | 23.96           | 19.52           | 18.29           | 25.55           | 23.93           | 22.39           | 0               | 0               | 0               | 0.9             | 0               | 0               | 1.78            | 4.16            | 0.88            |
| CLV1   | 5.61            | 6.85            | 5.25            | 2.05            | 1.64            | 1.79            | 2.04            | 1.48            | 1.02            | 0.43            | 0.43            | 0.28            | 0.16            | 0.79            | 0.65            | 1.15            | 1.3             | 1.06            |
| CLV1   | 11.18           | 12.76           | 5.3             | 2.28            | 1.94            | 2.02            | 2.32            | 2.34            | 0.93            | 2.77            | 2.22            | 3.38            | 1.3             | 2.36            | 1.33            | 3.78            | 3.01            | 2.84            |
| CLV1   | 10.32           | 12.01           | 9.02            | 3.29            | 2.49            | 3.02            | 2.87            | 1.78            | 1.54            | 0.49            | 0.78            | 0.76            | 1.02            | 1.1             | 1.04            | 1.71            | 3.78            | 2.06            |
| TET18  | 1.76            | 1               | 1.61            | 2.57            | 3.14            | 1.82            | 8.26            | 6.56            | 8.48            | 11.65           | 9.86            | 10.05           | 3.55            | 2.58            | 3.19            | 2.8             | 3.49            | 3.73            |
| RTNLB8 | 47.37           | 54.96           | 38.89           | 25.74           | 23.68           | 23.31           | 21.28           | 19.13           | 15.08           | 7.81            | 5.99            | 6.94            | 15.2            | 17.25           | 16.31           | 17.93           | 19.94           | 16.92           |
| BHLH66 | 6.12            | 7.21            | 7.43            | 2.99            | 2.5             | 2.97            | 3.53            | 4.93            | 3.39            | 3.88            | 4.94            | 4.03            | 5.54            | 9.52            | 7.24            | 9.57            | 13.55           | 10.39           |
| UBQ    | 114.65          | 136.38          | 105.29          | 50.51           | 39.12           | 49.71           | 78.88           | 57.93           | 50.19           | 10.58           | 9.01            | 9.98            | 9.49            | 17.9            | 18.4            | 14.38           | 28.58           | 16.9            |
| SOBIR1 | 9.23            | 11.13           | 5.94            | 5.16            | 6.53            | 6.78            | 6.02            | 3.6             | 1.51            | 3.18            | 2.81            | 2.82            | 5.53            | 6.5             | 7.15            | 11.44           | 32.14           | 22.43           |
| CPI    | 9.04            | 10.2            | 9.34            | 7.53            | 7.28            | 7.56            | 4.18            | 4.92            | 4.48            | 0               | 0               | 0               | 0.17            | 0               | 0.1             | 0               | 0.06            | 0               |
| PER    | 63              | 66.15           | 38.84           | 20.18           | 20.78           | 18.04           | 10.49           | 9.86            | 5.08            | 1.99            | 0.51            | 1.74            | 2.43            | 3.92            | 3.27            | 15.3            | 12.25           | 17.26           |
| PER    | 22.92           | 38.87           | 20.62           | 5.41            | 1.52            | 1.44            | 13.92           | 8.9             | 2.37            | 1.67            | 1.21            | 2.15            | 8.66            | 15.76           | 22.94           | 2.62            | 13.99           | 4.86            |
| PER    | 240.29          | 256.72          | 169.11          | 62.95           | 40.3            | 44.03           | 17.92           | 26.02           | 1.31            | 24.6            | 20.29           | 26.02           | 31.51           | 41.48           | 45.32           | 37.65           | 75.11           | 55.77           |
| STR6   | 68.08           | 64.04           | 56.12           | 29.88           | 23.41           | 25.68           | 6.33            | 6.39            | 4.22            | 15.45           | 10.95           | 10.66           | 14.96           | 17.41           | 20.1            | 25.28           | 33.64           | 22.85           |

|       |       |       |       |       |        |        |        |        |         |       |       |       |       |       |       |      |       |       |
|-------|-------|-------|-------|-------|--------|--------|--------|--------|---------|-------|-------|-------|-------|-------|-------|------|-------|-------|
| TUBA  | 69.95 | 71.72 | 78.06 | 212.6 | 243.56 | 253.99 | 719.02 | 987.65 | 1347.38 | 0     | 0.97  | 0.22  | 0     | 0     | 0     | 0    | 0     | 0     |
| CYCB  | 5.83  | 5.47  | 5.49  | 8.2   | 9.71   | 8.43   | 13.47  | 14.71  | 19.6    | 11.49 | 11.39 | 10.14 | 3.5   | 4.7   | 5.8   | 5.25 | 4.95  | 4.55  |
| CALS1 | 0.05  | 0.04  | 0.25  | 0.04  | 0.08   | 0      | 0      | 0.02   | 0       | 37.66 | 37.13 | 34.64 | 69.45 | 72.47 | 66.18 | 73.1 | 84.51 | 90.81 |

---

**Table S7.** AS events of *AGPL1*, *bHLH66* and *TUBA* detected in FER and STE.

| Gene Name | Seqname      | Type | Pos                 | Strand | Total transcripts                                                                              |
|-----------|--------------|------|---------------------|--------|------------------------------------------------------------------------------------------------|
| TUBA      | COGENT022181 | A3   | 3048-3139:3048-4093 | +      | STE.Isoform0011529,FER.Isoform0013504,FER.Isoform0000665                                       |
| TUBA      | COGENT022181 | RI   | 3139:3839-3891:4281 | +      | FER.Isoform0013504,STE.Isoform0025073                                                          |
| AGPL1     | COGENT005093 | RI   | 1074:1128-3269:3362 | +      | FER.Isoform0034717,FER.Isoform0016344,FER.Isoform0023129,STE.Isoform0026880,FER.Isoform0003271 |
| bHLH66    | COGENT005831 | RI   | 1:68-122:1502       | +      | FER.Isoform0016909,STE.Isoform0029880                                                          |

**Table S8.** The repeat units of SSRs in FER and STE.

| Number of Repeat Unit | Di-  |      | Tri- |      | Tetra- |     | Penta- |     | Hexa |     |
|-----------------------|------|------|------|------|--------|-----|--------|-----|------|-----|
|                       | FER  | STE  | FER  | STE  | FER    | STE | FER    | STE | FER  | STE |
| 4-7                   | 1231 | 1158 | 2024 | 1742 | 461    | 405 | 134    | 130 | 284  | 224 |
| 8-11                  | 838  | 836  | 103  | 99   | 2      | 2   | 0      | 0   | 1    | 4   |
| 12-15                 | 278  | 301  | 5    | 5    | 0      | 0   | 0      | 0   | 0    | 0   |
| 16-19                 | 111  | 133  | 0    | 0    | 0      | 0   | 0      | 0   | 0    | 0   |
| 20-99                 | 58   | 57   | 0    | 0    | 0      | 0   | 0      | 0   | 0    | 0   |

**Table S9.** Primers for qRT-PCR.

| Gene ID     | Gene Description | Sequence (5' -> 3')                              |
|-------------|------------------|--------------------------------------------------|
| Iso_0002325 | SUS              | CAACCATTACGAGGAAGC<br>CAACTAACACCAAAGCCAC        |
| Iso_0010189 | CLV1             | GGGTGAACCTGGAAGACG<br>AAGCGGTGAGACAATGAGC        |
| Iso_0014905 | UBQ10            | GGCGAAGATTCAGGATAAA<br>GAATGTTGTAGTCGGCTAGAGT    |
| Iso_0015412 | AGPL1            | GGGAGGACATAGGAACAAT<br>TGAATCCAATACCCGACA        |
| Iso_0053653 | PER12            | GCAGTTGGAGGACCAGAGT<br>AAGCCTTGATGAGGGTGG        |
| Iso_0011552 | PFK2             | TGCGGTGGTTCTGGCTAT<br>GTTGATGCCTTGGCTCTTG        |
| Iso_0012780 | TUBA             | TCCAACCTCGACCAGTGTAGC<br>AGCAGCCAAGTCCTCACG      |
| Iso_0053321 | TET18            | GGTACCCACCAACCTCA<br>CATCCACTGCCACAACGA          |
| Iso_0024626 | SOBIR            | TTGTTGGGATGCTGTGGC<br>CTGCGTCGGTCTCGTTTT         |
| Reference   | EF1              | GCAAGGAACTGGAGAAGGAACCC<br>GACGCATGTCCCTCACAGCAA |
